# Supplementary material for: Perception is associated with the brain’s metabolic response to sensory stimulation
Source: eLife. 2022 Feb 28;11:e71016. doi: 10.7554/eLife.71016 (PMC9038191; doi:10.7554/eLife.71016)
Supplement: Figure 1—source data 1. [file elife-71016-fig1-data1.xlsx]

## Sheet: Sheet1
Figure 1
Demographics and fMRI study parameters
Subject Count	Gender	Age	Run	Calibration (*)
1	M	35	1	72.5
2	F	32	2	72.5
3	M	29	1	73.5
4	F	24	2	71.8
5	M	26	1	72.1
6	F	27	2	73.5
7	M	28	1	70.1
8	M	20	1	72.1
9	F	26	2	70.1
10	F	28	1	72.1
11	F	20	2	70.1
12	F	20	1	73.5
13	F	20	1	71.8
14	M	21	2	73.5
15	M	21	1	71.8
16	F	26	2	70.1
17	M	20	1	70.1
18	F	26	2	72.8
19	M	25	1	71.8
(*) Calibration refers to the % brightness adjustment for the green color relative to the brightness of the red color.
