# Supplementary material for: Perception is associated with the brain’s metabolic response to sensory stimulation
Source: eLife. 2022 Feb 28;11:e71016. doi: 10.7554/eLife.71016 (PMC9038191; doi:10.7554/eLife.71016)
Supplement: Figure 2—source data 1. [file elife-71016-fig2-data1.xlsx]

## Sheet: Sheet1
Figure 1
Cortical regions preferentially activated by PF compared to UF
Cluster	Level	Anatomical Label (*)	Size (Voxels)	qFDR	Coordinates (mm)
					X	Y	Z
1	Peak	45.0% GM Visual cortex V3V L	28	0.003	-32	-92	-6
		40.0% GM Visual cortex V4 L
		10.0% GM Visual cortex V2 BA18 L
	ROI	50% GM Visual cortex V3V L
		39% GM Visual cortex V4 L
2	Peak	53.0% GM Visual cortex V3V R	25	0.003	30	-96	6
		19.0% GM Visual cortex V2 BA18 R
		9.0% GM Visual cortex V1 BA17 R
	ROI	48% GM Visual cortex V3V R
		24% GM Visual cortex V1 BA17 R
		16% GM Visual cortex V2 BA18 R
		12% WM Optic radiation R
3	Peak	40.0% GM Visual cortex V2 BA18 L	25	0.003	-22	98	12
		13.0% GM Visual cortex V3V L
		10.0% GM Visual cortex V1 BA17 L
	ROI	84% GM Visual cortex V2 BA18 L
4	Peak	30.0% GM Visual cortex V4 R	14	0.021	42	-86	-2
		10.0% GM Visual cortex V3V R
	ROI	64% GM Visual cortex V3V R
		29% GM Visual cortex V4 R
5	Peak	1.0% GM Visual cortex V2 BA18 L	11	0.034	-28	-90	4
		1.0% GM Visual cortex V3V L
	ROI	27% WM Optic radiation L
(*) Cluster location was determined from either the Peak coordinate or the average ROI composition in the Juelich Histological Atlas (Eickhoff et al., NeuroImage 2005, 25(4):13251335) using the mni2atlas tool (https://github.com/dmascali/mni2atlas).
