# Supplementary material for: Perception is associated with the brain’s metabolic response to sensory stimulation
Source: eLife. 2022 Feb 28;11:e71016. doi: 10.7554/eLife.71016 (PMC9038191; doi:10.7554/eLife.71016)
Supplement: Figure 3—source data 1. [file elife-71016-fig3-data1.xlsx]

## Sheet: Sheet1
Figure 2
Demographics and 1H-fMRS study parameters
Subject Count	VOI Position	Runs (*)	Linewidth (Hz)
1	L	1/2	6.8
2	L	2/1	8.3
3	R	1/-	7.5
4	R	2/1	7.7
5	L	1/2	6.7
6	L	2/1	6.7
7	L	1/2	5.7
8	R	2/1	7.5
9	L	1/2	6.6
10	R	2/1	6.8
11	R	1/2	7.5
12	L	1/2	7.9
13	R	2/1	7.8
14	L	2/1	7.4
15	L	2/1	7.6
16	R	2/1	7.5
17	R	2/1	7
18	R	1/2	6.3
19	L	2/1	7.1
(*) A dash indicates that the relevant measurement has not been performed due to technical reasons.
