# Supplementary material for: Perception is associated with the brain’s metabolic response to sensory stimulation
Source: eLife. 2022 Feb 28;11:e71016. doi: 10.7554/eLife.71016 (PMC9038191; doi:10.7554/eLife.71016)
Supplement: Figure 3—source data 2. [file elife-71016-fig3-data2.xlsx]

## Sheet: Sheet1
Figure 2
Modulations of metabolic profile of V1 during PF and UF stimulations
Metabolite	N	CRLB (*)	ΔConcentration (STIM-REST, μmol/g)
			PF (mean)	PF (SD)	UF (mean)	UF (SD)
Asp	19	0.11	-0.07	0.22	-0.06	0.28
tCr	19	0.03	0	0.06	0	0.08
GABA	15	0.16	-0.13	0.27	-0.01	0.22
Gln	19	0.12	-0.03	0.07	0.05	0.1
Glu	19	0.06	0.03	0.17	0.28	0.16	(§)
GSH	18	0.14	-0.04	0.16	0.06	0.14
Lac	16	0.25	-0.04	0.13	0.29	0.18	(§)
Ins	19	0.05	-0.02	0.09	-0.01	0.11
NAA+NAAG	19	0.03	-0.02	0.13	0.01	0.09
tCho	19	0.08	0.02	0.12	0.03	0.15
Tau	16	0.24	0.04	0.17	-0.01	0.17
(*) Only metabolites with CRLB<30% in at least 15 subjects are reported (35% for lactate). CRLB are averaged between all the epochs.
(§) Statistically significant.
